# Supplementary material for: Endoplasmic reticulum stress enhances fibrosis through IRE1α‐mediated degradation of miR‐150 and XBP‐1 splicing
Source: PubMed Central journal article supplement (PMC4931288; doi:10.15252/emmm.201505925), 2016-05-25

overexposed irrelevant blot

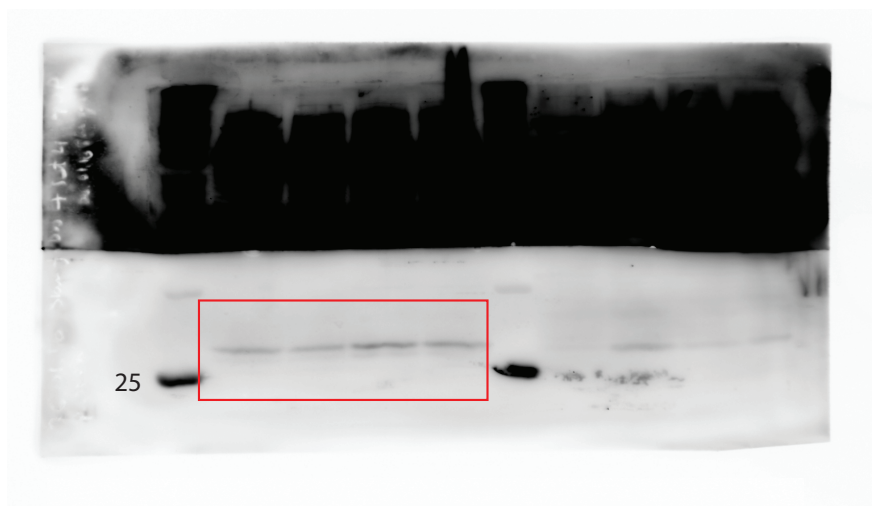

$\beta$ Actin

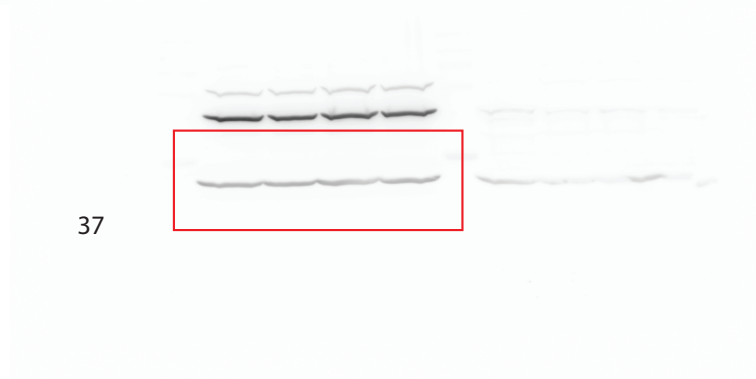

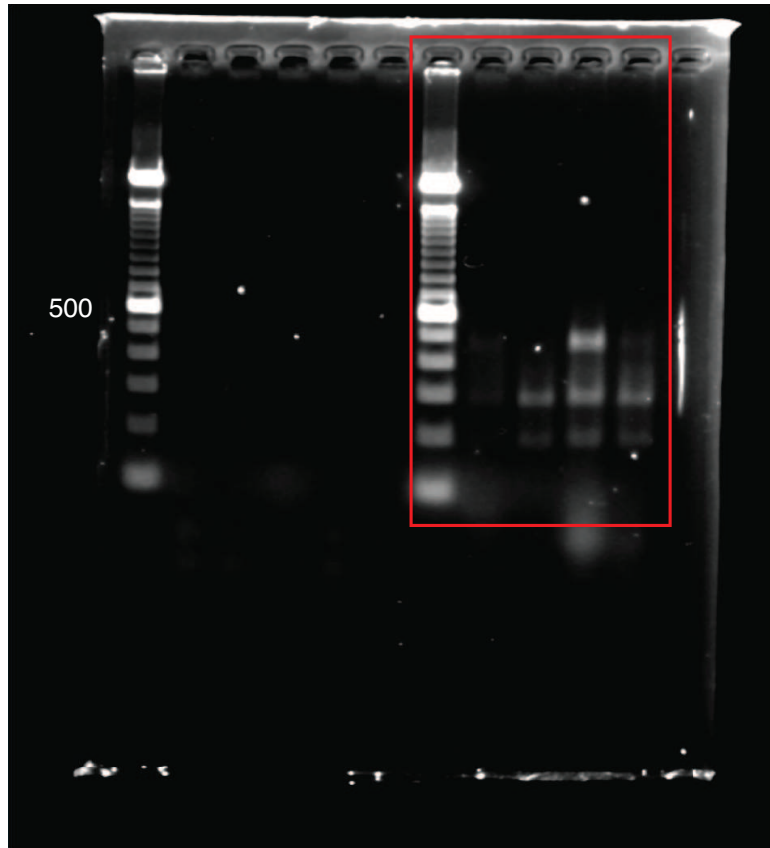

Supplement: EMMM-8-729-s007.pdf [file EMMM-8-729-s007.pdf]
